# Supplementary material for: Molecular dynamics simulation studies of absorption in piperazine activated MDEA solution
Source: Royal Society of Chemistry journal article supplement (doi:10.1039/c0cp02238a), 2011-01-01
Supplement: c0cp02238a.pdf [file c0cp02238a.pdf]

## Appendix

**Table 8 Partial atomic charges calculated for MDEA using 3 different schemes**

| Atom | MPA      | LPA      | CM4      | Atom | MPA      | LPA      | CM4      |
|------|----------|----------|----------|------|----------|----------|----------|
| N1   | -0.46013 | -0.19702 | -0.46258 | H12  | 0.09469  | 0.09825  | 0.05337  |
| C2   | -0.16432 | -0.22775 | -0.00278 | H13  | 0.12202  | 0.11344  | 0.07352  |
| H3   | 0.11847  | 0.10917  | 0.06274  | O14  | -0.57709 | -0.35763 | -0.48039 |
| H4   | 0.11185  | 0.10673  | 0.06005  | H15  | 0.32501  | 0.22577  | 0.31673  |
| H5   | 0.08830  | 0.07969  | 0.03748  | C16  | -0.04059 | -0.11617 | 0.06112  |
| C6   | -0.05649 | -0.13928 | 0.03249  | C17  | 0.04654  | -0.04938 | 0.06983  |
| H7   | 0.06342  | 0.07176  | 0.02954  | H18  | 0.10118  | 0.09037  | 0.04852  |
| H8   | 0.11454  | 0.11133  | 0.06565  | H19  | 0.10822  | 0.09691  | 0.05437  |
| H9   | 0.07888  | 0.07918  | 0.03789  | O20  | -0.56651 | -0.36062 | -0.49044 |
| C10  | 0.06906  | -0.05336 | 0.06754  | H21  | 0.33075  | 0.23240  | 0.32242  |
| H11  | 0.09220  | 0.08620  | 0.04292  |      |          |          |          |

**Table 9 Partial atomic charges calculated for PZ using 3 different schemes**

| Atom | MPA      | LPA      | CM4     | Atom | MPA      | LPA      | CM4      |
|------|----------|----------|---------|------|----------|----------|----------|
| C1   | -0.04494 | -0.13372 | 0.04385 | H9   | 0.11413  | 0.10965  | 0.06458  |
| C2   | -0.05667 | -0.12607 | 0.05419 | H10  | 0.08922  | 0.09267  | 0.04785  |
| C3   | -0.05669 | -0.12752 | 0.05274 | H11  | 0.07603  | 0.07231  | 0.03022  |
| C4   | -0.04494 | -0.13399 | 0.04359 | H12  | 0.10708  | 0.10742  | 0.06275  |
| H5   | 0.07591  | 0.07175  | 0.02965 | N13  | -0.53651 | -0.29572 | -0.58745 |
| H6   | 0.10736  | 0.10799  | 0.06333 | H14  | 0.25172  | 0.17477  | 0.28535  |
| H7   | 0.08947  | 0.09316  | 0.04834 | N15  | -0.52638 | -0.28888 | -0.58130 |
| H8   | 0.11408  | 0.10885  | 0.06377 | H16  | 0.24114  | 0.16733  | 0.27854  |

**Table 10 Partial atomic charges calculated for PZCOO using 3 different schemes**

| Atom | MPA      | LPA      | CM4     | Atom | MPA      | LPA      | CM4      |
|------|----------|----------|---------|------|----------|----------|----------|
| C1   | -0.03902 | -0.12251 | 0.05474 | H10  | 0.05102  | 0.06642  | 0.02490  |
| C2   | 0.01618  | -0.12053 | 0.05709 | H11  | 0.07175  | 0.07387  | 0.03180  |
| C3   | 0.01601  | -0.12015 | 0.05749 | H12  | 0.11930  | 0.10726  | 0.06271  |
| C4   | -0.03896 | -0.12323 | 0.05403 | N13  | -0.51931 | -0.29944 | -0.58704 |
| H5   | 0.07161  | 0.07326  | 0.03119 | H14  | 0.25134  | 0.17263  | 0.28296  |
| H6   | 0.11933  | 0.10722  | 0.06266 | N15  | -0.55732 | -0.21256 | -0.47952 |
| H7   | 0.05107  | 0.06700  | 0.02548 | C16  | 0.58155  | 0.12315  | 0.41829  |
| H8   | 0.08355  | 0.10667  | 0.06889 | O17  | -0.68076 | -0.50273 | -0.61708 |
| H9   | 0.08350  | 0.10665  | 0.06883 | O18  | -0.68083 | -0.50299 | -0.61741 |

**Table 11 Partial atomic charges calculated for PZH using 3 different schemes**

| Atom | MPA      | LPA      | CM4     | Atom | MPA      | LPA      | CM4      |
|------|----------|----------|---------|------|----------|----------|----------|
| C1   | -0.07148 | -0.10275 | 0.06204 | H10  | 0.12610  | 0.10751  | 0.06198  |
| C2   | -0.08444 | -0.11862 | 0.06166 | H11  | 0.17468  | 0.13158  | 0.08630  |
| C3   | -0.08439 | -0.11906 | 0.06123 | H12  | 0.19144  | 0.14515  | 0.10147  |
| C4   | -0.07163 | -0.10221 | 0.06258 | N13  | -0.43636 | 0.00650  | -0.34428 |
| H5   | 0.17468  | 0.13172  | 0.08644 | N14  | -0.53021 | -0.27374 | -0.56959 |
| H6   | 0.19143  | 0.14527  | 0.10158 | H15  | 0.26313  | 0.18313  | 0.29360  |
| H7   | 0.12638  | 0.10830  | 0.06278 | H16  | 0.38804  | 0.25416  | 0.35686  |
| H8   | 0.13460  | 0.12847  | 0.08299 | H17  | 0.37350  | 0.24604  | 0.34926  |
| H9   | 0.13454  | 0.12856  | 0.08309 |      |          |          |          |
